# Supplementary material for: Advances in photobiomodulation for cognitive improvement by near-infrared derived multiple strategies
Source: Springer Nature journal article supplement (doi:10.1186/s12967-023-03988-w), 2023-02-22
Supplement: MOESM1 [file 24055052]

This document certifies that the manuscript

## **Advances in Photobiomodulation for Cognitive Improvement by Near-Infrared Derived Multiple Strategies**

prepared by the authors

**Weitong Pan, Panmiao Liu, Daqing Ma, Jianjun Yang**

was edited for proper English language, grammar, punctuation, spelling, and overall style by one or more of the highly qualified native English speaking editors at AJE.

This certificate was issued on **August 18, 2022** and may be verified on the [AJE website](#) using the verification code **524A-9986-550A-FF46-967A**.

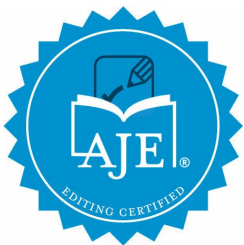

Neither the research content nor the authors' intentions were altered in any way during the editing process. Documents receiving this certification should be English-ready for publication; however, the author has the ability to accept or reject our suggestions and changes. To verify the final AJE edited version, please visit our verification page at [aje.com/certificate](#). If you have any questions or concerns about this edited document, please contact AJE at [support@aje.com](mailto:support@aje.com).

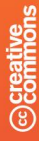

Help us build a vibrant, collaborative global commons

[Donate Now](#)

This page is available in the following languages: [English](#)

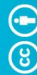

## Attribution 4.0 International (CC BY 4.0)

This is a human readable summary of (and not a substitute for) the license. [Disclaimer.](#)

### You are free to:

- Share** — copy and redistribute the material in any medium or format
- Adapt** — remix, transform, and build upon the material for any purpose, even commercially.

The licensor cannot revoke these freedoms as long as you follow the license terms.

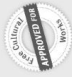

### Under the following terms:

- Attribution** — You must give appropriate credit, provide a link to the license, and indicate if changes were made. You may do so in any reasonable manner, but not in any way that suggests the licensor endorses you or your use.
- No additional restrictions** — You may not apply legal terms or technological measures that legally restrict others from doing anything the license permits.

### Notices:

You do not have to comply with the license for elements of the material in the public domain or where your use is permitted by an applicable [exception or limitation](#).

No warranties are given. The license may not give you all of the permissions necessary for your intended use. For example, other rights such as [publicity, privacy, or moral rights](#) may limit how you use the material.

This content is freely available under a [strong legal license](#) because of Creative Commons. If you love this content, please consider a donation to support our work.

| Contribute today to Creative Commons | Amount    |
|--------------------------------------|-----------|
| <input type="radio"/>                | \$5       |
| <input type="radio"/>                | \$15      |
| <input type="radio"/>                | \$25      |
| <input type="radio"/>                | \$ Amount |

[Donate Now](#)

[Learn more about CC licensing, or use the license for your own material.](#)

**Antibody-conjugated gold nanoparticles as nanotransducers for second near-infrared photo-stimulation of neurons in rats**

**Author:** Jiانشeng Liu et al  
**Publication:** Nano Convergence  
**Publisher:** Springer Nature  
**Date:** Mar 21, 2022  
*Copyright © 2022, The Author(s)*

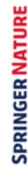

**Creative Commons**

This is an open access article distributed under the terms of the Creative Commons CC BY license, which permits unrestricted use, distribution, and reproduction in any medium, provided the original work is properly cited.

You are not required to obtain permission to reuse this article.  
To request permission for a type of use not listed, please contact Springer Nature

**Gold Nanorods with Spatial Separation of CeO<sub>2</sub> Deposition for Plasmonic-Enhanced Antioxidant Stress and Photothermal Therapy of Alzheimer's Disease**

Author: Kezhen Ge, Yingfeng Mu, Miaoyan Liu, et al

Publication: Applied Materials

Publisher: American Chemical Society

Date: Jan 1, 2022

Copyright © 2022, American Chemical Society

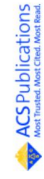

**PERMISSION/LICENSE IS GRANTED FOR YOUR ORDER AT NO CHARGE**

This type of permission/license, instead of the standard Terms and Conditions, is sent to you because no fee is being charged for your order. Please note the following:

- Permission is granted for your request in both print and electronic formats, and translations.
- If figures and/or tables were requested, they may be adapted or used in part.
- Please print this page on your records and send a copy of it to your publisher/graduate school.
- Appropriate credit for the requested material should be given as follows: "Reprinted (adapted) with permission from (COMPLETE REFERENCE CITATION). Copyright (YEAR) American Chemical Society." Insert appropriate information in place of the capitalized words.
- One-time Permission is granted only for the use specified in your RightsLink request. No additional uses are granted (such as derivative works or other editions). For any uses, please submit a new request.

If credit is given to another source for the material you requested from RightsLink, permission must be obtained from that source.

[BACK](#)

[CLOSE WINDOW](#)

**Order Number:** 1221001**Order Date:** 13 May 2022

## Payment Information

Weitong Pan

pwt981013@163.com

**Payment method:** Invoice**Billing Address:**

Miss Weitong Pan

The First Affiliated Hospital of Zhengzhou University  
Zhengzhou  
China

+86 13213191903

pwt981013@163.com

**Customer Location:**

Miss Weitong Pan

The First Affiliated Hospital of Zhengzhou University  
Zhengzhou  
China

## Order Details

### 1. Biomaterials science

**Billing Status:**  
Open

**Article:** Targeted Graphene Oxide for Drug Delivery as a Therapeutic Nanoplatfom against Parkinson's Disease

|                            |           |                    |                                             |
|----------------------------|-----------|--------------------|---------------------------------------------|
| <b>Order License ID</b>    | 1221001-1 | <b>Type of use</b> | Republish in a journal/magazine             |
| <b>Order detail status</b> | Completed | <b>Publisher</b>   | Royal Society of Chemistry                  |
| <b>ISSN</b>                | 2047-4849 | <b>Portion</b>     | Image/photo/illustration                    |
|                            |           |                    | <b>0.00 USD</b><br>Republication Permission |

## LICENSED CONTENT

|                          |                                                                                                    |                         |                                                                                                                 |
|--------------------------|----------------------------------------------------------------------------------------------------|-------------------------|-----------------------------------------------------------------------------------------------------------------|
| <b>Publication Title</b> | Biomaterials science                                                                               | <b>Publication Type</b> | e-Journal                                                                                                       |
| <b>Article Title</b>     | Targeted Graphene Oxide for Drug Delivery as a Therapeutic Nanoplatfom against Parkinson's Disease | <b>Start Page</b>       | 1705                                                                                                            |
|                          |                                                                                                    | <b>End Page</b>         | 1715                                                                                                            |
|                          |                                                                                                    | <b>Issue</b>            | 5                                                                                                               |
|                          |                                                                                                    | <b>Volume</b>           | 9                                                                                                               |
| <b>Author/Editor</b>     | Kyōto Daigaku.Busshitsu-Saibō Tōgō Shisutemu Kyoten,Royal Society of Chemistry (Great Britain)     | <b>URL</b>              | <a href="http://pubs.rsc.org/en/journals/journalissues/bm">http://pubs.rsc.org/en/journals/journalissues/bm</a> |
| <b>Date</b>              | 01/01/2013                                                                                         |                         |                                                                                                                 |
| <b>Language</b>          | English                                                                                            |                         |                                                                                                                 |
| <b>Country</b>           | United Kingdom of Great Britain and Northern Ireland                                               |                         |                                                                                                                 |
| <b>Rightsholder</b>      | Royal Society of Chemistry                                                                         |                         |                                                                                                                 |

## REQUEST DETAILS

---

|                                           |                          |                             |                                  |
|-------------------------------------------|--------------------------|-----------------------------|----------------------------------|
| Portion Type                              | Image/photo/illustration | Distribution                | Worldwide                        |
| Number of images / photos / illustrations | 1                        | Translation                 | Original language of publication |
| Format (select all that apply)            | Print                    | Copies for the disabled?    | No                               |
| Who will republish the content?           | Publisher, STM           | Minor editing privileges?   | No                               |
| Duration of Use                           | Life of current edition  | Incidental promotional use? | Yes                              |
| Lifetime Unit Quantity                    | Up to 499                | Currency                    | USD                              |
| Rights Requested                          | Main product             |                             |                                  |

## NEW WORK DETAILS

---

|             |                                                                                                                      |                                 |            |
|-------------|----------------------------------------------------------------------------------------------------------------------|---------------------------------|------------|
| Title       | Advances of Near-Infrared Photobiomodulation Integrating with Photosensitive Nanomaterials for Cognitive Improvement | Publisher                       | Wiley-VCH  |
| Author      | Weitong Pan                                                                                                          | Expected publication date       | 2023-05-01 |
| Publication | Advanced science                                                                                                     | Expected size (number of pages) | 5          |

## ADDITIONAL DETAILS

---

|                                                               |             |
|---------------------------------------------------------------|-------------|
| The requesting person / organization to appear on the license | Weitong Pan |
|---------------------------------------------------------------|-------------|

## REUSE CONTENT DETAILS

---

|                                                           |                                                                                                                                                                                                         |                                                  |                                                                                                                                                                                                         |
|-----------------------------------------------------------|---------------------------------------------------------------------------------------------------------------------------------------------------------------------------------------------------------|--------------------------------------------------|---------------------------------------------------------------------------------------------------------------------------------------------------------------------------------------------------------|
| Title, description or numeric reference of the portion(s) | Figure 1                                                                                                                                                                                                | Title of the article/chapter the portion is from | Targeted Graphene Oxide for Drug Delivery as a Therapeutic Nanoplatfrom against Parkinson's Disease                                                                                                     |
| Editor of portion(s)                                      | Xiong, Sha; Luo, Jingshan; Wang, Qun; Li, Zhongjun; Li, Juntong; Liu, Qiao; Gao, Liqian; Fang, Shu-Huan; Li, Yunyong; Pan, Huafeng; Wang, Hong; Zhang, Yongbin; Wang, Qi; Chen, Xiao-jia; Chen, Tongkai | Author of portion(s)                             | Xiong, Sha; Luo, Jingshan; Wang, Qun; Li, Zhongjun; Li, Juntong; Liu, Qiao; Gao, Liqian; Fang, Shu-Huan; Li, Yunyong; Pan, Huafeng; Wang, Hong; Zhang, Yongbin; Wang, Qi; Chen, Xiao-jia; Chen, Tongkai |
| Volume of serial or monograph                             | 9                                                                                                                                                                                                       | Issue, if republishing an article from a serial  | 5                                                                                                                                                                                                       |
| Page or page range of portion                             | 1705-1715                                                                                                                                                                                               | Publication date of portion                      | 2021-03-10                                                                                                                                                                                              |

**Total Items: 1**

Subtotal: 0.00 USD  
**Order Total: 0.00 USD**



# JOHN WILEY AND SONS LICENSE TERMS AND CONDITIONS

Jan 18, 2022

---

---

This Agreement between Weitong Pan ("You") and John Wiley and Sons ("John Wiley and Sons") consists of your license details and the terms and conditions provided by John Wiley and Sons and Copyright Clearance Center.

License Number                    5232211476269

License date                      Jan 18, 2022

Licensed Content  
Publisher                          John Wiley and Sons

Licensed Content  
Publication                        Advanced Functional Materials



|                         |                                                                                                             |
|-------------------------|-------------------------------------------------------------------------------------------------------------|
| Licensed Content Title  | Photothermal Modulation of Depression-Related Ion Channel Function through Conjugated Polymer Nanoparticles |
| Licensed Content Author | Boying Li, Yiying Wang, Dong Gao, et al                                                                     |
| Licensed Content Date   | Mar 3, 2021                                                                                                 |
| Licensed Content Volume | 31                                                                                                          |
| Licensed Content Issue  | 19                                                                                                          |
| Licensed Content Pages  | 9                                                                                                           |
| Type of use             | Journal/Magazine                                                                                            |
| Requestor type          | Publisher (STM Signatory)                                                                                   |
| STM publisher name      | Elsevier                                                                                                    |

Is the reuse sponsored by no  
or associated with a  
pharmaceutical or medical  
products company?

Format Print and electronic

Portion Figure/table

Number of figures/tables 1

Will you be translating? No

Circulation 1 - 29

Title of new article A review of the pathogenesis of  
cognitive dysfunction and the  
development of corresponding  
photobiomodulation methods

Lead author Weitong Pan

|                           |                                                                                                                                    |
|---------------------------|------------------------------------------------------------------------------------------------------------------------------------|
| Title of targeted journal | Engineered Regeneration                                                                                                            |
| Publisher                 | Elsevier                                                                                                                           |
| Expected publication date | Oct 2023                                                                                                                           |
| Order reference number    | 1                                                                                                                                  |
| Portions                  | Figure 1                                                                                                                           |
| Requestor Location        | Weitong Pan<br>The First Affiliated Hospital of<br>Zhengzhou University<br><br>Zhengzhou, other<br>China<br>Attn: Miss Weitong Pan |
| Publisher Tax ID          | EU826007151                                                                                                                        |
| Total                     | 0.00 USD                                                                                                                           |

## Terms and Conditions

### **TERMS AND CONDITIONS**

This copyrighted material is owned by or exclusively licensed to John Wiley & Sons, Inc. or one of its group companies (each a "Wiley Company") or handled on behalf of a society with which a Wiley Company has exclusive publishing rights in relation to a particular work (collectively "WILEY"). By clicking "accept" in connection with completing this licensing transaction, you agree that the following terms and conditions apply to this transaction (along with the billing and payment terms and conditions established by the Copyright Clearance Center Inc., ("CCC's Billing and Payment terms and conditions"), at the time that you opened your RightsLink account (these are available at any time at <http://myaccount.copyright.com>).

### **Terms and Conditions**

- The materials you have requested permission to reproduce or reuse (the "Wiley Materials") are protected by copyright.

- You are hereby granted a personal, non-exclusive, non-sub licensable (on a stand-alone basis), non-transferable, worldwide, limited license to reproduce the Wiley Materials for the purpose specified in the licensing process. This license, **and any CONTENT (PDF or image file) purchased as part of your order**, is for a one-time use only and limited to any maximum distribution number specified in the license. The first instance of republication or reuse granted by this license must be completed within two years of the date of the grant of this license (although copies prepared before the end date may be distributed thereafter). The Wiley Materials shall not be used in any other manner or for any other purpose, beyond what is granted in the license. Permission is granted subject to an appropriate acknowledgement given to the author, title of the material/book/journal and the publisher. You shall also duplicate the copyright notice that appears in the Wiley publication in your use of the Wiley Material. Permission is also granted on the understanding that nowhere in the text is a previously published source acknowledged for all or part of this Wiley Material. Any third party content is expressly excluded from this permission.
- With respect to the Wiley Materials, all rights are reserved. Except as expressly granted by the terms of the license, no part of the Wiley Materials may be copied,

modified, adapted (except for minor reformatting required by the new Publication), translated, reproduced, transferred or distributed, in any form or by any means, and no derivative works may be made based on the Wiley Materials without the prior permission of the respective copyright owner. **For STM Signatory Publishers clearing permission under the terms of the [STM Permissions Guidelines](#) only, the terms of the license are extended to include subsequent editions and for editions in other languages, provided such editions are for the work as a whole in situ and does not involve the separate exploitation of the permitted figures or extracts,** You may not alter, remove or suppress in any manner any copyright, trademark or other notices displayed by the Wiley Materials. You may not license, rent, sell, loan, lease, pledge, offer as security, transfer or assign the Wiley Materials on a stand-alone basis, or any of the rights granted to you hereunder to any other person.

- The Wiley Materials and all of the intellectual property rights therein shall at all times remain the exclusive property of John Wiley & Sons Inc, the Wiley Companies, or their respective licensors, and your interest therein is only that of having possession of and the right to reproduce the Wiley Materials pursuant to Section 2 herein during the continuance of this Agreement. You

agree that you own no right, title or interest in or to the Wiley Materials or any of the intellectual property rights therein. You shall have no rights hereunder other than the license as provided for above in Section 2. No right, license or interest to any trademark, trade name, service mark or other branding ("Marks") of WILEY or its licensors is granted hereunder, and you agree that you shall not assert any such right, license or interest with respect thereto

- NEITHER WILEY NOR ITS LICENSORS MAKES ANY WARRANTY OR REPRESENTATION OF ANY KIND TO YOU OR ANY THIRD PARTY, EXPRESS, IMPLIED OR STATUTORY, WITH RESPECT TO THE MATERIALS OR THE ACCURACY OF ANY INFORMATION CONTAINED IN THE MATERIALS, INCLUDING, WITHOUT LIMITATION, ANY IMPLIED WARRANTY OF MERCHANTABILITY, ACCURACY, SATISFACTORY QUALITY, FITNESS FOR A PARTICULAR PURPOSE, USABILITY, INTEGRATION OR NON-INFRINGEMENT AND ALL SUCH WARRANTIES ARE HEREBY EXCLUDED BY WILEY AND ITS LICENSORS AND WAIVED BY YOU.
- WILEY shall have the right to terminate this Agreement immediately upon breach of this Agreement by you.

- You shall indemnify, defend and hold harmless WILEY, its Licensors and their respective directors, officers, agents and employees, from and against any actual or threatened claims, demands, causes of action or proceedings arising from any breach of this Agreement by you.
- IN NO EVENT SHALL WILEY OR ITS LICENSORS BE LIABLE TO YOU OR ANY OTHER PARTY OR ANY OTHER PERSON OR ENTITY FOR ANY SPECIAL, CONSEQUENTIAL, INCIDENTAL, INDIRECT, EXEMPLARY OR PUNITIVE DAMAGES, HOWEVER CAUSED, ARISING OUT OF OR IN CONNECTION WITH THE DOWNLOADING, PROVISIONING, VIEWING OR USE OF THE MATERIALS REGARDLESS OF THE FORM OF ACTION, WHETHER FOR BREACH OF CONTRACT, BREACH OF WARRANTY, TORT, NEGLIGENCE, INFRINGEMENT OR OTHERWISE (INCLUDING, WITHOUT LIMITATION, DAMAGES BASED ON LOSS OF PROFITS, DATA, FILES, USE, BUSINESS OPPORTUNITY OR CLAIMS OF THIRD PARTIES), AND WHETHER OR NOT THE PARTY HAS BEEN ADVISED OF THE POSSIBILITY OF SUCH DAMAGES. THIS LIMITATION SHALL APPLY NOTWITHSTANDING ANY FAILURE OF ESSENTIAL PURPOSE OF ANY LIMITED REMEDY PROVIDED HEREIN.



- Should any provision of this Agreement be held by a court of competent jurisdiction to be illegal, invalid, or unenforceable, that provision shall be deemed amended to achieve as nearly as possible the same economic effect as the original provision, and the legality, validity and enforceability of the remaining provisions of this Agreement shall not be affected or impaired thereby.
- The failure of either party to enforce any term or condition of this Agreement shall not constitute a waiver of either party's right to enforce each and every term and condition of this Agreement. No breach under this agreement shall be deemed waived or excused by either party unless such waiver or consent is in writing signed by the party granting such waiver or consent. The waiver by or consent of a party to a breach of any provision of this Agreement shall not operate or be construed as a waiver of or consent to any other or subsequent breach by such other party.
- This Agreement may not be assigned (including by operation of law or otherwise) by you without WILEY's prior written consent.
- Any fee required for this permission shall be non-refundable after thirty (30) days from receipt by the CCC.

- These terms and conditions together with CCC's Billing and Payment terms and conditions (which are incorporated herein) form the entire agreement between you and WILEY concerning this licensing transaction and (in the absence of fraud) supersedes all prior agreements and representations of the parties, oral or written. This Agreement may not be amended except in writing signed by both parties. This Agreement shall be binding upon and inure to the benefit of the parties' successors, legal representatives, and authorized assigns.
- In the event of any conflict between your obligations established by these terms and conditions and those established by CCC's Billing and Payment terms and conditions, these terms and conditions shall prevail.
- WILEY expressly reserves all rights not specifically granted in the combination of (i) the license details provided by you and accepted in the course of this licensing transaction, (ii) these terms and conditions and (iii) CCC's Billing and Payment terms and conditions.
- This Agreement will be void if the Type of Use, Format, Circulation, or Requestor Type was misrepresented during the licensing process.

- This Agreement shall be governed by and construed in accordance with the laws of the State of New York, USA, without regards to such state's conflict of law rules. Any legal action, suit or proceeding arising out of or relating to these Terms and Conditions or the breach thereof shall be instituted in a court of competent jurisdiction in New York County in the State of New York in the United States of America and each party hereby consents and submits to the personal jurisdiction of such court, waives any objection to venue in such court and consents to service of process by registered or certified mail, return receipt requested, at the last known address of such party.

## **WILEY OPEN ACCESS TERMS AND CONDITIONS**

Wiley Publishes Open Access Articles in fully Open Access Journals and in Subscription journals offering Online Open. Although most of the fully Open Access journals publish open access articles under the terms of the Creative Commons Attribution (CC BY) License only, the subscription journals and a few of the Open Access Journals offer a choice of Creative Commons Licenses. The license type is clearly identified on the article.

### **The Creative Commons Attribution License**

The [Creative Commons Attribution License \(CC-BY\)](#), allows users to copy, distribute and transmit an article, adapt the article and make commercial use of the article. The CC-BY license permits commercial and non-

### **Creative Commons Attribution Non-Commercial License**

The [Creative Commons Attribution Non-Commercial \(CC-BY-NC\) License](#) permits use, distribution and reproduction in any medium, provided the original work is properly cited and is not used for commercial purposes.(see below)

### **Creative Commons Attribution-Non-Commercial-NoDerivs License**

The [Creative Commons Attribution Non-Commercial-NoDerivs License](#) (CC-BY-NC-ND) permits use, distribution and reproduction in any medium, provided the original work is properly cited, is not used for commercial purposes and no modifications or adaptations are made. (see below)

### **Use by commercial "for-profit" organizations**

Use of Wiley Open Access articles for commercial, promotional, or marketing purposes requires further explicit permission from Wiley and will be subject to a fee.

Further details can be found on Wiley Online Library  
<http://olabout.wiley.com/WileyCDA/Section/id-410895.html>

**Other Terms and Conditions:**

**v1.10 Last updated September 2015**

**Questions? [customercare@copyright.com](mailto:customercare@copyright.com) or +1-855-239-3415 (toll free in the US) or +1-978-646-2777.**

---

---
